# Supplementary material for: Face-to-face π-stacking in the multicomponent crystals of chloranilic acid, alkali hydrogenchloranilates, and water
Source: Royal Society of Chemistry journal article supplement (doi:10.1039/c1ce05161j), 2011-01-01
Supplement: c1ce05161j.pdf [file c1ce05161j.pdf]

# **Face-to-face $\pi$ -stacking in the multicomponent crystals of chloranilic acid, alkali hydrogenchloranilates, and water**

## **Supplement Data**

Krešimir Molčanov, Igor Sabljic and Biserka Kojić-Prodić  
Rudjer Bošković Institute, POB-180, HR-10002 Zagreb, Croatia

- S1 Hydrogen bonding**
- S2 Geometries of quinoid rings**
- S3 Cation coordinations**
- S4 List of structures extracted from the CSD**

## S1 Hydrogen bonding

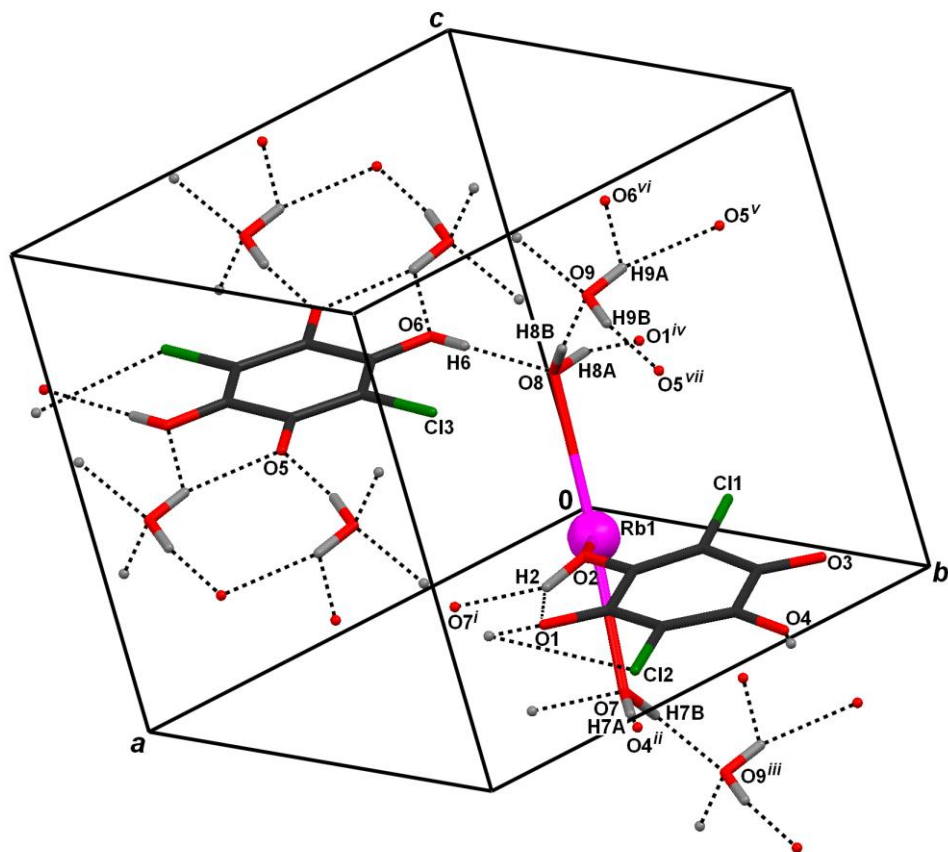

**Figure S1** Hydrogen bonding in the isostructural packings of RbHCA·0.5H<sub>2</sub>CA·3H<sub>2</sub>O and CsHCA·0.5H<sub>2</sub>CA·3H<sub>2</sub>O. The alkali cation is arbitrarily scaled. Symmetry operators: *i*) 1 - *x*, 1 - *y*, -*z*; *ii*) 1 - *x*, 2 - *y*, -*z*; *iii*) *x*, *y*, -1 + *z*; *iv*) -1 + *x*, -1 + *y*, *z*; *v*) -1 + *x*, *y*, *z*; *vi*) -*x*, -*y*, 1 - *z*; *vii*) 1 - *x*, 1 - *y*, 1 - *z*.

**Table S1** Geometric parameters of hydrogen bonds.

|                                                 | <i>D</i> -H / Å | H··· <i>A</i> / Å | <i>D</i> ··· <i>A</i> / Å | <i>D</i> -H··· <i>A</i> / ° | Symm. op. on <i>A</i>                    |
|-------------------------------------------------|-----------------|-------------------|---------------------------|-----------------------------|------------------------------------------|
| <b>CsHCA·0.5H<sub>2</sub>CA·3H<sub>2</sub>O</b> |                 |                   |                           |                             |                                          |
| O2-H2···O1                                      | 0.95            | 2.11              | 2.670(3)                  | 116                         | <i>x</i> , <i>y</i> , <i>z</i>           |
| O2-H2···O7                                      | 0.95            | 1.82              | 2.611(4)                  | 139                         | 1 - <i>x</i> , 1 - <i>y</i> , - <i>z</i> |
| O6-H6···Cl3                                     | 0.83            | 2.62              | 3.0899(18)                | 117                         | <i>x</i> , <i>y</i> , <i>z</i>           |
| O6-H6···O8                                      | 0.83            | 1.75              | 2.505(3)                  | 150                         | <i>x</i> , <i>y</i> , <i>z</i>           |

|                                                        |         |         |          |        |                               |
|--------------------------------------------------------|---------|---------|----------|--------|-------------------------------|
| O7-H7A...O4                                            | 0.94    | 1.89    | 2.779(2) | 156    | $1 - x, 2 - y, -z$            |
| O7-H7B...O9                                            | 0.95    | 1.90    | 2.831(3) | 164    | $x, y, -1 + z$                |
| O8-H8A...O1                                            | 0.94    | 1.86    | 2.761(3) | 159    | $-1 + x, -1 + y, z$           |
| O8-H8B...O9                                            | 0.94    | 1.85    | 2.784(3) | 170    | $x, y, z$                     |
| O9-H9A...O5                                            | 0.93    | 2.05    | 2.962(4) | 163    | $-1 + x, y, z$                |
| O9-H9A...O6                                            | 0.93    | 2.32    | 2.949(3) | 124    | $-x, -y, 1 - z$               |
| O9-H9B...O5                                            | 0.93    | 1.97    | 2.892(2) | 172    | $1 - x, 1 - y, 1 - z$         |
| <b>RbHCA·0.5H<sub>2</sub>CA·3H<sub>2</sub>O</b>        |         |         |          |        |                               |
| O2-H2...O1                                             | 0.94    | 2.13    | 2.680(4) | 116    | $x, y, z$                     |
| O2-H2...O7                                             | 0.94    | 1.80    | 2.606(4) | 142    | $1 - x, 1 - y, -z$            |
| O6-H6...Cl3                                            | 0.82    | 2.63    | 3.089(3) | 117    | $x, y, z$                     |
| O6-H6...O8                                             | 0.82    | 1.76    | 2.505(4) | 150    | $x, y, z$                     |
| O7-H7A...O4                                            | 0.94    | 1.87    | 2.771(4) | 160    | $1 - x, 2 - y, -z$            |
| O7-H7B...O9                                            | 0.94    | 1.92    | 2.849(4) | 169    | $x, y, -1 + z$                |
| O8-H8A...O1                                            | 0.94    | 1.85    | 2.752(4) | 162    | $-1 + x, -1 + y, z$           |
| O8-H8B...O9                                            | 0.93    | 1.86    | 2.783(4) | 172    | $x, y, z$                     |
| O9-H9A...O5                                            | 0.92    | 2.05    | 2.941(4) | 162    | $-1 + x, y, z$                |
| O9-H9A...O6                                            | 0.92    | 2.32    | 2.941(4) | 124    | $-x, -y, 1 - z$               |
| O9-H9B...O5                                            | 0.92    | 1.96    | 2.875(2) | 172    | $1 - x, 1 - y, 1 - z$         |
| <b>NaHCA·2(NH<sub>2</sub>)<sub>2</sub>CO</b>           |         |         |          |        |                               |
| N1-H1A...O6                                            | 0.89(4) | 2.04(3) | 2.934(4) | 175(2) | $x, -1 + y, z$                |
| N1-H1B...O4                                            | 0.83(3) | 2.28(3) | 3.054(3) | 157(3) | $x, y, z$                     |
| O2-H2...O1                                             | 0.82(4) | 2.21(4) | 2.653(2) | 114(3) | $x, y, z$                     |
| O2-H2...O6                                             | 0.82(4) | 1.94(4) | 2.704(2) | 155(4) | $3/2 - x, -1/2 + y, 1/2 - z$  |
| N2-H2A...O1                                            | 0.83(4) | 2.33(4) | 3.090(3) | 154(4) | $-1/2 + x, 1/2 - y, -1/2 + z$ |
| N3-H3A...Cl2                                           | 0.83(4) | 2.89(4) | 3.599(4) | 144(4) | $2 - x, 1 - y, -z$            |
| N3-H3B...O5                                            | 0.82(2) | 2.48(3) | 3.220(3) | 150(3) | $x, y, z$                     |
| N4-H4A...O4                                            | 0.85(4) | 2.10(3) | 2.913(3) | 158(4) | $2 - x, 1 - y, -z$            |
| <b>Cs<sub>2</sub>CA·(NH<sub>2</sub>)<sub>2</sub>CO</b> |         |         |          |        |                               |
| N1-H1A...O3                                            | 0.86    | 2.45    | 3.197(6) | 146    | $-x, -y, 1 - z$               |
| N1-H1B...O1                                            | 0.86    | 2.17    | 2.849(7) | 136    | $-x, -y, 1 - z$               |

## S2 Geometries of quinoid rings

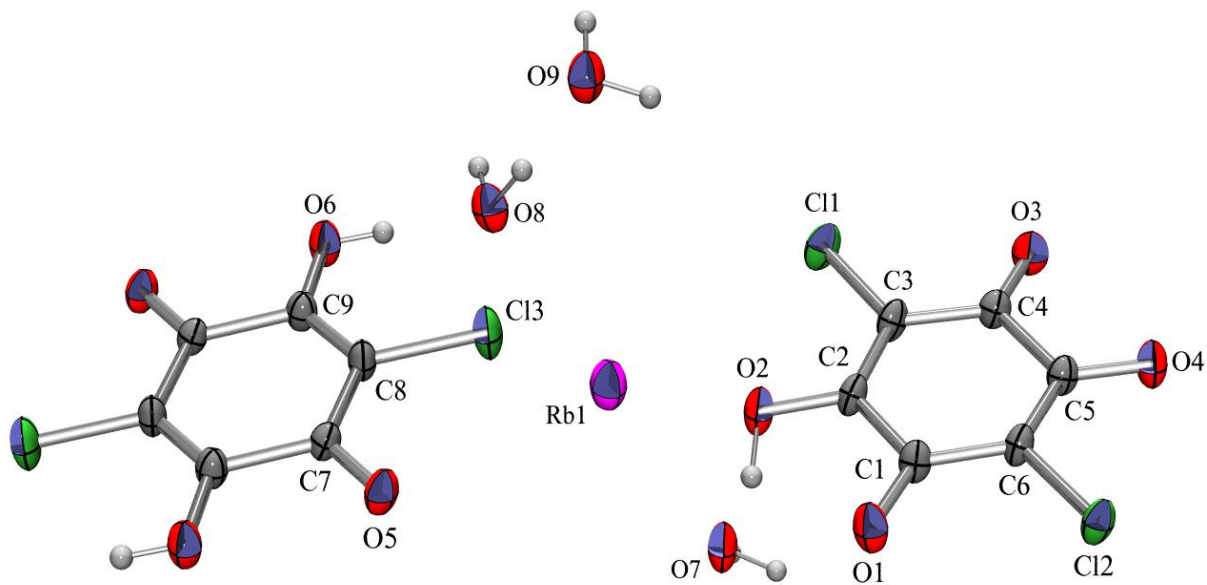

**Figure S2** Asymmetric unit of RbHCA·H<sub>2</sub>CA·3H<sub>2</sub>O. Displacement ellipsoids are drawn at the 50 % probability and hydrogen atoms have been depicted as spheres of arbitrary radii.

**Table S2** Bond lengths in molecules of chloranilic acid and hydrogen chloranilate anions in CsHCA·H<sub>2</sub>CA·3H<sub>2</sub>O and RbHCA·H<sub>2</sub>CA·3H<sub>2</sub>O.

|                        | <b>CsHCA·H<sub>2</sub>CA·3H<sub>2</sub>O</b> | <b>RbHCA·H<sub>2</sub>CA·3H<sub>2</sub>O</b> |
|------------------------|----------------------------------------------|----------------------------------------------|
| <b>HCA<sup>-</sup></b> |                                              |                                              |
| C1 – C2                | 1.518(3)                                     | 1.508(4)                                     |
| C2 – C3                | 1.354(3)                                     | 1.364(4)                                     |
| C3 – C4                | 1.451(3)                                     | 1.446(4)                                     |
| C4 – C5                | 1.545(3)                                     | 1.544(4)                                     |
| C5 – C6                | 1.408(3)                                     | 1.402(4)                                     |
| C6 – C1                | 1.409(3)                                     | 1.410(4)                                     |
| C1 – O1                | 1.243(3)                                     | 1.248(4)                                     |
| C2 – O2                | 1.315(3)                                     | 1.314(4)                                     |
| C4 – O3                | 1.217(3)                                     | 1.220(4)                                     |
| C5 – O4                | 1.238(3)                                     | 1.243(4)                                     |
| C3 – C11               | 1.719(2)                                     | 1.718(3)                                     |
| C6 – C12               | 1.727(2)                                     | 1.730(3)                                     |
| <b>H<sub>2</sub>CA</b> |                                              |                                              |
| C7 – C8                | 1.454(3)                                     | 1.455(4)                                     |
| C8 – C9                | 1.359(3)                                     | 1.355(4)                                     |
| C7 – C9 <sup>i</sup>   | 1.511(3)                                     | 1.516(4)                                     |
| C7 – O5                | 1.220(3)                                     | 1.224(4)                                     |
| C9 – O6                | 1.303(3)                                     | 1.300(4)                                     |
| C8 – C13               | 1.719(2)                                     | 1.714(3)                                     |

**Table S3** Bond lengths in hydrogen chloranilate mono anion in NaHCA[(NH<sub>2</sub>)<sub>2</sub>CO]<sub>2</sub>.

|          |          |
|----------|----------|
| C1 – C2  | 1.510(3) |
| C2 – C3  | 1.342(3) |
| C3 – C4  | 1.441(3) |
| C4 – C5  | 1.546(3) |
| C5 – C6  | 1.386(3) |
| C6 – C1  | 1.403(3) |
| C1 – O1  | 1.235(3) |
| C2 – O2  | 1.322(3) |
| C4 – O3  | 1.217(3) |
| C5 – O4  | 1.245(3) |
| C3 – Cl1 | 1.719(2) |
| C6 – Cl2 | 1.733(2) |

**Table S4** Bond lengths in chloranilate dianion in Cs<sub>2</sub>CA•(NH<sub>2</sub>)<sub>2</sub>CO.

|                      |          |
|----------------------|----------|
| C1 – C2              | 1.413(7) |
| C2 – C3              | 1.408(7) |
| C1 – C3 <sup>i</sup> | 1.524(7) |
| C1 – O1              | 1.242(6) |
| C3 – O2              | 1.252(6) |
| C2 – Cl1             | 1.730(5) |

## S2 Cation coordinations

**Table S5** Geometry of cation coordination sphere in CsHCA·H<sub>2</sub>CA·3H<sub>2</sub>O and RbHCA·H<sub>2</sub>CA·3H<sub>2</sub>O (Å, °). Symmetry operators: *i*)  $x, -1+y, z$ ; *ii*)  $-x, 1-y, -z$ ; *iii*)  $1-x, 1-y, -z$ .

|                                                       | CsHCA·H <sub>2</sub> CA·3H <sub>2</sub> O | RbHCA·H <sub>2</sub> CA·3H <sub>2</sub> O |
|-------------------------------------------------------|-------------------------------------------|-------------------------------------------|
| M – O4 <sup><i>i</i></sup>                            | 3.1006(18)                                | 2.934(2)                                  |
| M – O7                                                | 3.105(2)                                  | 2.949(3)                                  |
| M – O3 <sup><i>i</i></sup>                            | 3.0740(19)                                | 2.952(2)                                  |
| M – O3 <sup><i>ii</i></sup>                           | 3.1851(19)                                | 3.049(2)                                  |
| M – O8                                                | 3.321(2)                                  | 3.167(3)                                  |
| M – O2                                                | 3.2475(18)                                | 3.201(2)                                  |
| M – O1 <sup><i>iii</i></sup>                          | 3.428(2)                                  | 3.424(3)                                  |
| O4 <sup><i>i</i></sup> – M – O7                       | 88.93(5)                                  | 87.74(7)                                  |
| O4 <sup><i>i</i></sup> – M – O3 <sup><i>i</i></sup>   | 51.53(5)                                  | 54.33(6)                                  |
| O4 <sup><i>i</i></sup> – M – O3 <sup><i>ii</i></sup>  | 136.61(5)                                 | 135.52(6)                                 |
| O4 <sup><i>i</i></sup> – M – O8                       | 87.20(5)                                  | 88.95(6)                                  |
| O4 <sup><i>i</i></sup> – M – O2                       | 79.56(5)                                  | 79.38(6)                                  |
| O4 <sup><i>i</i></sup> – M – O1 <sup><i>iii</i></sup> | 66.28(5)                                  | 65.95(6)                                  |
| O7 – M – O3 <sup><i>i</i></sup>                       | 117.51(5)                                 | 117.71(7)                                 |
| O7 – M – O3 <sup><i>ii</i></sup>                      | 94.93(5)                                  | 96.43(7)                                  |
| O7 – M – O8                                           | 173.90(5)                                 | 172.96(7)                                 |
| O7 – M – O2                                           | 77.46(5)                                  | 76.64(7)                                  |
| O7 – M – O1 <sup><i>iii</i></sup>                     | 54.25(5)                                  | 54.50(6)                                  |
| O3 <sup><i>i</i></sup> – M – O3 <sup><i>ii</i></sup>  | 89.54(5)                                  | 85.61(6)                                  |
| O3 <sup><i>i</i></sup> – M – O8                       | 63.21(5)                                  | 64.80(6)                                  |
| O3 <sup><i>i</i></sup> – M – O2                       | 125.94(5)                                 | 128.55(6)                                 |
| O3 <sup><i>i</i></sup> – M – O1 <sup><i>iii</i></sup> | 65.14(5)                                  | 64.70(6)                                  |
| O3 <sup><i>ii</i></sup> – M – O8                      | 91.13(5)                                  | 90.29(6)                                  |
| O3 <sup><i>ii</i></sup> – M – O2                      | 143.40(5)                                 | 144.69(6)                                 |

---

|                                          |           |           |
|------------------------------------------|-----------|-----------|
| O3 <sup>ii</sup> – M – O1 <sup>iii</sup> | 81.28(5)  | 80.75(6)  |
| O8 – M – O2                              | 97.19(5)  | 96.65(6)  |
| O8 – M – O1 <sup>iii</sup>               | 127.80(5) | 129.19(6) |
| O2 – M – O1 <sup>iii</sup>               | 119.10(5) | 118.99(6) |

---

**Table S6** Geometry of sodium coordination sphere in NaHCA[(NH<sub>2</sub>)<sub>2</sub>CO]<sub>2</sub> (Å,°).  
Symmetry operators: *i*) 1–*x*, 1–*y*, –*z*; *ii*) 3/2–*x*, 1/2+*y*, 1/2–*z*.

---

|                                          |            |
|------------------------------------------|------------|
| Na1 – O5 <sup>i</sup>                    | 2.2863(18) |
| Na1 – O5                                 | 2.3323(18) |
| Na1 – O6                                 | 2.3346(19) |
| Na1 – O1 <sup>ii</sup>                   | 2.389(2)   |
| Na1 – O4                                 | 2.4240(18) |
| Na1 – O3                                 | 2.443(2)   |
| O5 <sup>i</sup> – Na1 – O5               | 87.28(7)   |
| O5 <sup>i</sup> – Na1 – O6               | 106.83(7)  |
| O5 <sup>i</sup> – Na1 – O1 <sup>ii</sup> | 91.87(7)   |
| O5 <sup>i</sup> – Na1 – O4               | 158.44(7)  |
| O5 <sup>i</sup> – Na1 – O3               | 92.68(7)   |
| O5 – Na1 – O6                            | 94.72(7)   |
| O5 – Na1 – O1 <sup>ii</sup>              | 170.97(8)  |
| O5 – Na1 – O4                            | 99.97(8)   |
| O5 – Na1 – O3                            | 98.14(7)   |
| O6 – Na1 – O1 <sup>ii</sup>              | 76.91(6)   |
| O6 – Na1 – O4                            | 92.89(7)   |
| O6 – Na1 – O3                            | 157.10(7)  |
| O1 <sup>ii</sup> – Na1 – O4              | 84.03(7)   |
| O1 <sup>ii</sup> – Na1 – O3              | 90.88(7)   |
| O4 – Na1 – O3                            | 66.31(6)   |

---



**Table S7** Geometry of caesium coordination sphere in  $\text{Cs}_2\text{CA}\cdot(\text{NH}_2)_2\text{CO}$  ( $\text{\AA},^\circ$ ).  
Symmetry operators: *i*)  $1/2-x, -1/2+y, z$ ; *ii*)  $x, 1-y, -1/2+z$ ; *iii*)  $1/2-x, 1/2-y, -1/2+z$ ; *iv*)  $-x, y, 1/2-z$ .

|                                            |            |
|--------------------------------------------|------------|
| Cs1 – O2 <sup>i</sup>                      | 2.988(4)   |
| Cs1 – O2 <sup>ii</sup>                     | 2.989(5)   |
| Cs1 – O1                                   | 3.070(4)   |
| Cs1 – O3                                   | 3.157(4)   |
| Cs1 – O1 <sup>iii</sup>                    | 3.399(5)   |
| Cs1 – O1 <sup>iv</sup>                     | 3.416(5)   |
| Cs1 – Cl1 <sup>i</sup>                     | 3.5270(15) |
| O2 <sup>i</sup> – Cs1 – O2 <sup>ii</sup>   | 139.18(5)  |
| O2 <sup>i</sup> – Cs1 – O1                 | 87.03(14)  |
| O2 <sup>i</sup> – Cs1 – O3                 | 106.13(10) |
| O2 <sup>i</sup> – Cs1 – O1 <sup>iii</sup>  | 69.05(13)  |
| O2 <sup>i</sup> – Cs1 – O1 <sup>iv</sup>   | 154.31(12) |
| O2 <sup>i</sup> – Cs1 – Cl1 <sup>i</sup>   | 53.81(9)   |
| O2 <sup>ii</sup> – Cs1 – O1                | 100.85(12) |
| O2 <sup>ii</sup> – Cs1 – O3                | 114.69(10) |
| O2 <sup>ii</sup> – Cs1 – O1 <sup>iii</sup> | 81.26(11)  |
| O2 <sup>ii</sup> – Cs1 – O1 <sup>iv</sup>  | 48.66(11)  |
| O2 <sup>ii</sup> – Cs1 – Cl1 <sup>i</sup>  | 152.03(9)  |
| O1 – Cs1 – O3                              | 79.01(10)  |
| O1 – Cs1 – O1 <sup>iii</sup>               | 141.65(9)  |
| O1 – Cs1 – O1 <sup>iv</sup>                | 67.60(16)  |
| O1 – Cs1 – Cl1 <sup>i</sup>                | 104.97(9)  |
| O3 – Cs1 – O1 <sup>iii</sup>               | 135.27(10) |
| O3 – Cs1 – O1 <sup>iv</sup>                | 74.00(9)   |
| O3 – Cs1 – Cl1 <sup>i</sup>                | 61.08(7)   |
| O1 <sup>iii</sup> – Cs1 – O1 <sup>iv</sup> | 129.40(2)  |
| O1 <sup>iii</sup> – Cs1 – Cl1 <sup>i</sup> | 85.10(8)   |
| O1 <sup>iv</sup> – Cs1 – Cl1 <sup>i</sup>  | 134.94(7)  |

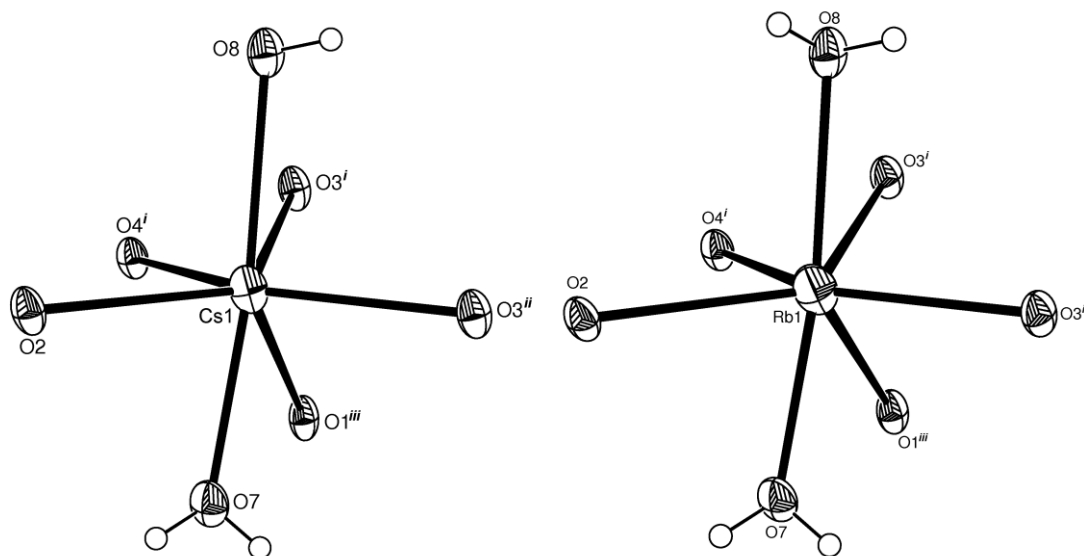

**Figure S3** ORTEP-3 drawings of cation coordination spheres in  $\text{CsHCA}\cdot\text{H}_2\text{CA}\cdot 3\text{H}_2\text{O}$  and  $\text{RbHCA}\cdot\text{H}_2\text{CA}\cdot 3\text{H}_2\text{O}$ . Both coordination polyhedra are distorted mono-capped octahedra. Symmetry operators: *i*)  $x, -1+y, z$ ; *ii*)  $-x, 1-y, -z$ ; *iii*)  $1-x, 1-y, -z$ .

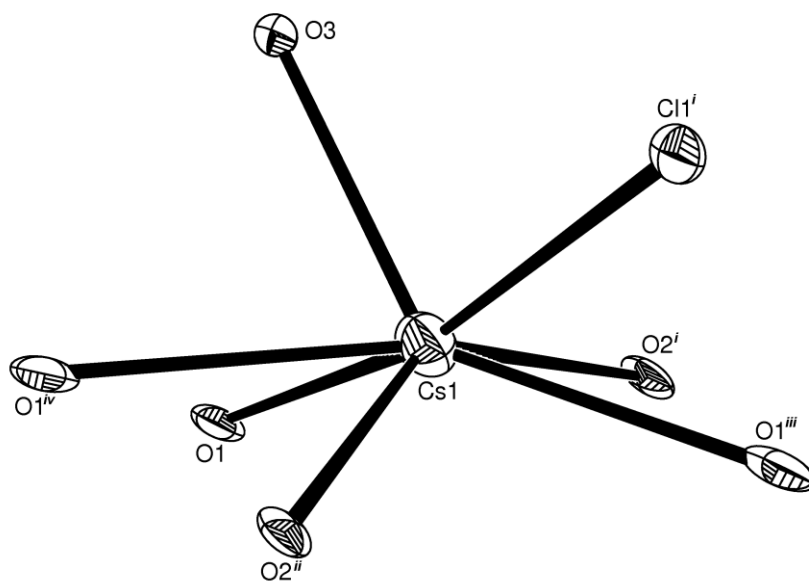

**Figure S4** ORTEP-3 drawing of caesium coordination sphere in  $\text{Cs}_2\text{CA}\cdot(\text{NH}_2)_2\text{CO}$ . The coordination polyhedron can be described as a distorted mono-capped pentagonal prism. Symmetry operators: *i*)  $1/2-x, -1/2+y, z$ ; *ii*)  $x, 1-y, -1/2+z$ ; *iii*)  $1/2-x, 1/2-y, -1/2+z$ ; *iv*)  $-x, y, 1/2-z$ .

## S4 List of structures extracted from the CSD

Table S8 List of structures extracted from the CSD.

| REFCODE  | Compound                                                                                                     | Reference                                                                                                                                                 |
|----------|--------------------------------------------------------------------------------------------------------------|-----------------------------------------------------------------------------------------------------------------------------------------------------------|
| ABUHIO   | 1,2-bis(Pyrid-2-yl)acetylene 2,5-dichloro-3,6-dihydroxy-1,4-benzoquinone                                     | Md.B.Zaman, M.Tomura and Y.Yamashita, <i>Org.Lett.</i> , 2000, <b>2</b> , 273                                                                             |
| AJAGIB   | Piperazine-2,5-dione chloranilic acid                                                                        | Tzy-Jiun M.Luo and G.T.R.Palmore, <i>Cryst.Growth Des.</i> , 2002, <b>2</b> , 337                                                                         |
| CAVYED   | 2,5-Dichloro-3,6-dihydroxy-p-benzoquinone bis(pyrimidine)                                                    | H.Ishida and S.Kashino, <i>Acta Crystallogr., Sect.C: Cryst.Struct.Commun.</i> , 1999, <b>55</b> , 1714                                                   |
| CAVYIH   | 2,5-Dichloro-3,6-dihydroxy-p-benzoquinone bis(pyrazine)                                                      | H.Ishida and S.Kashino, <i>Acta Crystallogr., Sect.C: Cryst.Struct.Commun.</i> , 1999, <b>55</b> , 1714                                                   |
| CLANAC10 | Chloranilic acid                                                                                             | E.K.Andersen <i>Acta Crystallogr.</i> , 1967, <b>22</b> , 188                                                                                             |
| CLANAC11 | 2,5-Dichloro-3,6-dihydroxy-1,4-benzoquinone                                                                  | G.Dutkiewicz, H.S.Yathirajan, Q.N.M.H.Al-arique, B.Narayana and M.Kubicki, <i>Acta Crystallogr., Sect.E: Struct.Rep.Online</i> , 2010, <b>66</b> , o497   |
| CLANDH   | Chloranilic acid dihydrate                                                                                   | E.K.Andersen, <i>Acta Crystallogr.</i> , 1967, <b>22</b> , 191                                                                                            |
| EBAWAG   | 2,2'-Bipyrimidine chloranilic acid tetrahydrate                                                              | Md.B.Zaman, K.A.Udachin and J.A.Ripmeester, <i>Cryst.Growth Des.</i> , 2004, <b>4</b> , 585                                                               |
| GINKUK   | Quinoxaline chloranilic acid                                                                                 | K.Gotoh, H.Nagoshi and H.Ishida, <i>Acta Crystallogr., Sect.E: Struct.Rep.Online</i> , 2007, <b>63</b> , o4295                                            |
| HUFZUE   | 2,5-Dichloro-3,6-dihydroxy-1,4-benzoquinone 2-azaspiro[4.5]decan-3-one                                       | J.P.Jasinski, R.J.Butcher, Q.N.M.H.Al-arique, H.S.Yathirajan and B.Narayana, <i>Acta Crystallogr., Sect.E: Struct.Rep.Online</i> , 2010, <b>66</b> , o163 |
| MAMPUM01 | 2,5-Dichloro-3,6-dihydroxy-1,4-benzoquinone phenazine                                                        | S.Horiuchi, R.Kumai and Y.Tokura, <i>J.Am.Chem.Soc.</i> , 2005, <b>127</b> , 5010                                                                         |
| MAMPUM02 | rac-(Phenazine chloranilic acid)                                                                             | K.Gotoh, T.Asaji and H.Ishida, <i>Acta Crystallogr., Sect.C Cryst.Struct.Commun.</i> , 2007, <b>63</b> , o17                                              |
| NIGQEA   | 4,4',5,4'-tetrakis(2-Pyrazinylmethylthio)tetrathiafulvalene bis(2,5-dichloro-3,6-dihydroxy-1,4-benzoquinone) | S.-X.Liu, S.Dolder, A.Neels, G.Labat, H.Stoekli-Evans and S.Decurtins, <i>J.Phys.IV</i> , 2004, <b>114</b> , 679                                          |
| NOQFUV   | 4,4'-Dimethyl-7,7'-bi[[1,2,5]thiadiazolo[3,4-b]pyridylidene) 2,5-dichloro-3,6-dihydroxy-1,4-benzoquinone     | M.Tomura, K.Ono and Y.Yamashita, <i>Struct.Chem.</i> , 2008, <b>19</b> , 967,                                                                             |
| PEZQAN   | 2,6-dimethylpyrazine chloranilic acid                                                                        | M.Prager, W.Sawka-Dobrowolska, L.Sobczyk, A.Pawlukojc, E.Grech, A.Wischniewski and M.Zamponi, <i>Chem.Phys.</i> , 2007, <b>332</b> , 1                    |
| QUCKAB   | Pyridine-3-carbonitrile chloranilic acid acetonitrile solvate                                                | K.Gotoh and H.Ishida, <i>Acta Crystallogr., Sect.E: Struct.Rep.Online</i> , 2009, <b>65</b> , o2467                                                       |
| WATREP   | Chloranilic acid tetramethylpyrazine                                                                         | W.Sawka-Dobrowolska, G.Bator, L.Sobczyk, E.Grech, J.Nowicka-Scheibe and A.Pawlukojc, <i>Struct.Chem.</i> , 2005, <b>16</b> , 281                          |
| WATREPO1 | 2,3,5,6-Tetramethylpyrazine 2,5-dichloro-3,6-dihydroxy-1,4-benzoquinone                                      | M.Prager, A.Pietraszko, L.Sobczyk, A.Pawlukojc, E.Grech, T.Seydel, A.Wischniewski and M.Zamponi, <i>J.Chem.Phys.</i> , 2006, <b>125</b> , 194525          |
| WATREPO2 | 2,3,5,6-Tetramethylpyrazine 2,5-dichloro-3,6-dihydroxy-1,4-benzoquinone                                      | M.Prager, A.Pietraszko, L.Sobczyk, A.Pawlukojc, E.Grech, T.Seydel, A.Wischniewski and M.Zamponi, <i>J.Chem.Phys.</i> , 2006, <b>125</b> , 194525          |
| ABUHUA   | 1-(4-Pyridinio)-2-(pyrid-4-yl)acetylene 2,5-dichloro-6-hydroxy-1,4-benzoquinon-3-olate                       | Md.B.Zaman, M.Tomura and Y.Yamashita, <i>Org.Lett.</i> , 2000, <b>2</b> , 273                                                                             |
| CIPSUQ   | 4,4'-Bipiperidinedi-ium bis(hydrogen chloranilate)                                                           | K.Gotoh, R.Ishikawa and H.Ishida, <i>Acta Crystallogr., Sect.E: Struct.Rep.Online</i> , 2007, <b>63</b> , o4518                                           |
| DUJGER   | 3-Hydroxypyridinium hydrogen chloranilate monohydrate                                                        | K.Gotoh and H.Ishida, <i>Acta Crystallogr., Sect.E: Struct.Rep.Online</i> , 2009, <b>65</b> , o3060                                                       |
| GOMBEP   | Pyridinium 2,5-dichloro-6-hydroxy-p-benzoquinone-3-olate monohydrate                                         | H.Ishida and S.Kashino, <i>Acta Crystallogr., Sect.C: Cryst.Struct.Commun.</i> , 1999, <b>55</b> , 1149,                                                  |
| HOLPEE   | 2-Carboxypyridinium hydrogen chloranilate                                                                    | K.Gotoh, H.Nagoshi and H.Ishida, <i>Acta Crystallogr., Sect.E: Struct.Rep.Online</i> , 2009, <b>65</b> , o614                                             |
| IGAKUX   | 2-Aminopyrimidin-1-ium 2,5-dichloro-4-hydroxy-3,6-dioxo-1,4-cyclohexadien-1-olate monohydrate                | Ping Su, Xue-Ying Huang and Xiang-gao Meng, <i>Acta Crystallogr., Sect.E: Struct.Rep.Online</i> , 2008, <b>64</b> , o2217                                 |
| JIQHAT   | 2-(2-(1,3-dithiol-2-ylidene)-1,3-dithiol-4-yl)-1H-imidazol-3-ium 2,5-dichloro-                               | T.Murata, Y.Morita, Y.Yakiyama, K.Fukui, H.Yamochi, G.Saito                                                                                               |

|          |                                                                                                                                     |                                                                                                                                                           |
|----------|-------------------------------------------------------------------------------------------------------------------------------------|-----------------------------------------------------------------------------------------------------------------------------------------------------------|
|          | 4-hydroxy-3,6-dioxocyclohexa-1,4-dien-1-olate monohydrate                                                                           | and K.Nakasuji, <i>J.Am.Chem.Soc.</i> , 2007, <b>129</b> , 10837                                                                                          |
| KEQPEC   | 4-Aminopyrimidino-2(1H)-one 2,5-dichloro-3,6-dihydroxy-1,4-benzoquinone monohydrate                                                 | K.Gotoh, R.Ishikawa and H.Ishida, <i>Acta Crystallogr., Sect.E: Struct.Rep.Online</i> , 2006, <b>62</b> , o4738                                           |
| KOQGEC   | Ethylammonium chloranilate                                                                                                          | H.Ishida and S.Kashino, <i>Acta Crystallogr., Sect.C: Cryst.Struct.Commun.</i> , 2000, <b>56</b> , e202                                                   |
| KOQGIG   | Diethylammonium chloranilate                                                                                                        | H.Ishida and S.Kashino, <i>Acta Crystallogr., Sect.C: Cryst.Struct.Commun.</i> , 2000, <b>56</b> , e202                                                   |
| MAJSUL   | bis(eta <sup>5</sup> -Pentamethyl-cyclopentadienyl)-iron 2,5-dichloro-3,6-dihydroxy-1,4-benzoquinone monohydrate clathrate          | M.B.Zaman, M.Tomura, Y.Yamashita, M.Sayaduzzaman and A.M.S.Chowdhury, <i>CrystEngComm</i> , 1999, <b>1</b> , 36                                           |
| MAMPUM03 | Phenazinium chloranilate                                                                                                            | K.Gotoh, T.Asaji and H.Ishida, <i>Acta Crystallogr., Sect.C: Cryst.Struct.Commun.</i> , 2007, <b>63</b> , o17                                             |
| NEQWEM   | Benzimidazolium chloranilate monohydrate                                                                                            | De-Jun Yang and Shao-hua Qu, <i>Acta Crystallogr., Sect.E: Struct.Rep.Online</i> , 2006, <b>62</b> , o4720                                                |
| NIGQAW   | 4,5-bis(2-Pyridiniomethylthio)-4',5'-bis(2-pyridylmethylthio)tetrathiafulvalene bis(2,5-dichloro-6-hydroxy-1,4-benzoquinon-3-olate) | S.-X.Liu, S.Dolder, A.Neels, G.Labat, H.Stoekli-Evans and S.Decurtins, <i>J.Phys.IV</i> , 2004, <b>114</b> , 679                                          |
| OMIXIR   | Piperidinium hydrogen chloranilate                                                                                                  | T.Fukunaga and H.Ishida, <i>Acta Crystallogr., Sect.E: Struct.Rep.Online</i> , 2003, <b>59</b> , o1793                                                    |
| PAGXOL   | 1,2,3,4-Tetrahydroquinolinium hydrogen chloranilate                                                                                 | H.Ishida, <i>Acta Crystallogr., Sect.E: Struct.Rep.Online</i> , 2004, <b>60</b> , o1674                                                                   |
| PAZHOO   | 3-Carboxypyridinium hydrogen chloranilate                                                                                           | Y.Tabuchi, A.Takahashi, K.Gotoh, H.Akashi and H.Ishida, <i>Acta Crystallogr., Sect.E: Struct.Rep.Online</i> , 2005, <b>61</b> , o4215                     |
| PAZHOO01 | 3-Carboxypyridinium hydrogen chloranilate                                                                                           | H.Ishida, Private Communication , , 2009                                                                                                                  |
| POVZEG   | 2-Carbamoylpyridinium hydrogen chloranilate                                                                                         | K.Gotoh, H.Nagoshi and H.Ishida, <i>Acta Crystallogr., Sect.C: Cryst.Struct.Commun.</i> , 2009, <b>65</b> , o273                                          |
| POVZIK   | 3-Carbamoylpyridinium hydrogen chloranilate                                                                                         | K.Gotoh, H.Nagoshi and H.Ishida, <i>Acta Crystallogr., Sect.C: Cryst.Struct.Commun.</i> , 2009, <b>65</b> , o273                                          |
| QIKGIA   | Imidazolium hydrogen chloranilate acetonitrile solvate                                                                              | H.Ishida and S.Kashino, <i>Acta Crystallogr., Sect.C: Cryst.Struct.Commun.</i> , 2001, <b>57</b> , 476                                                    |
| SIYCAF   | 2,9-Dimethyl-1,10-phenanthrolium chloranilate                                                                                       | A.S.Gaballa, C.Wagner, S.M.Teleb, E.-M.Nour, M.A.F.Elmosallamy, G.N.Kaluderovic, H.Schmidt and D.Steinborn, <i>J.Mol.Struct.</i> , 2008, <b>876</b> , 301 |
| SOMDOO   | 2,2'-(3,5-Di(pyridin-2-yl)pyrazine-2,6-diyl)dipyridinium bis(2,5-dichloro-4-hydroxy-3,6-dioxocyclohexanolate)                       | S.Horiuchi, R.Kumai, Y.Tokunaga and Y.Tokura, <i>J.Am.Chem.Soc.</i> , 2008, <b>130</b> , 13382                                                            |
| TIXTUQ   | 4-Cyanopyridinium hydrogen chloranilate                                                                                             | M.Tomura and Y.Yamashita, <i>Anal.Sci.: X-Ray Struct.Anal.Online</i> , 2008, <b>24</b> , x31                                                              |
| UHOTIV   | Ammonium hydrogen chloranilate dihydrate                                                                                            | K.Molcanov, B.Kojic-Prodic and A.Meden, <i>CrystEngComm</i> , 2009, <b>11</b> , 1407                                                                      |
| ULEHOI   | 4,6-bis(2-Pyridyl)-2-(2-pyridinio)-1,3,5-triazine 2,5-dichloro-6-hydroxy-1,4-benzoquinone-3-olate monohydrate                       | M.K.Kabir, H.Tobita, H.Matsuo, K.Nagayoshi, K.Yamada, K.Adachi, Y.Sugiyama, S.Kitagawa and S.Kawata, <i>Cryst.Growth Des.</i> , 2003, <b>3</b> , 791      |
| WOGWUL   | Pyridazin-1-ium hydrogen chloranilate                                                                                               | K.Gotoh and H.Ishida, <i>Acta Crystallogr., Sect.E: Struct.Rep.Online</i> , 2008, <b>64</b> , o2095                                                       |
| WUXYUJ   | 2,4-Dimethylpyridinium 2,5-dichloro-6-hydroxy-1,4-benzoquinone-3-olate                                                              | H.Ishida and S.Kashino, <i>Z.Naturforsch.,A: Phys.Sci.</i> , 2002, <b>57</b> , 829                                                                        |
| WUXZAQ   | 2,5-Dimethylpyridinium 2,5-dichloro-6-hydroxy-1,4-benzoquinone-3-olate                                                              | H.Ishida and S.Kashino, <i>Z.Naturforsch.,A: Phys.Sci.</i> , 2002, <b>57</b> , 829                                                                        |
| WUXZEU   | 2,6-Dimethylpyridinium 2,5-dichloro-6-hydroxy-1,4-benzoquinone-3-olate                                                              | H.Ishida and S.Kashino, <i>Z.Naturforsch.,A: Phys.Sci.</i> , 2002, <b>57</b> , 829                                                                        |
| WUXZII   | 3,4-Dimethylpyridinium 2,5-dichloro-6-hydroxy-1,4-benzoquinone-3-olate                                                              | H.Ishida and S.Kashino, <i>Z.Naturforsch.,A: Phys.Sci.</i> , 2002, <b>57</b> , 829                                                                        |
| YERXUP   | 4-Carboxypyridinium 2,5-dichloro-4-hydroxy-3,6-dioxocyclohexa-1,4-dien-1-olate monohydrate                                          | K.Gotoh, Y.Tabuchi, H.Akashi and H.Ishida, <i>Acta Crystallogr., Sect.E: Struct.Rep.Online</i> , 2006, <b>62</b> , o4420                                  |
| YERXUP01 | 4-Carboxypyridinium hydrogen chloranilate monohydrate                                                                               | H.Ishida, Private Communication, 2009                                                                                                                     |
| ABUHOU   | 1,2-bis(3-Pyridinio)acetylene 2,5-dichloro-1,4-benzoquinone-3,6-diolate hydrate                                                     | Md.B.Zaman, M.Tomura and Y.Yamashita, <i>Org.Lett.</i> , 2000, <b>2</b> , 273                                                                             |
| ACEWIP   | bis(Trimethylpyridinium) chloranilate                                                                                               | H.Ishida, <i>Acta Crystallogr., Sect.E: Struct.Rep.Online</i> , 2004, <b>60</b> , o2005                                                                   |
| AMCLAN10 | Ammonium chloranilate monohydrate                                                                                                   | E.K.Andersen, <i>Acta Crystallogr.</i> , 1967, <b>22</b> , 196                                                                                            |
| BALROV   | bis(Anilinium) chloroanilate                                                                                                        | Z.G.Aliev, S.I.Kondrat'ev, L.O.Atovmyan, M.L.Khidekel and V.V.Karpov, <i>Izv.Akad.Nauk SSSR,Ser.Khim.(Russ.)(Russ.Chem.Bull.)</i> , 1981, 487             |
| BALRUB   | Ammonium chloroanilate oxonium monohydrate                                                                                          | Z.G.Aliev, S.I.Kondrat'ev, L.O.Atovmyan, M.L.Khidekel and V.V.Karpov, <i>Izv.Akad.Nauk</i>                                                                |

|          |                                                                                                                           |                                                                                                                                                                             |
|----------|---------------------------------------------------------------------------------------------------------------------------|-----------------------------------------------------------------------------------------------------------------------------------------------------------------------------|
|          |                                                                                                                           | <i>SSSR, Ser. Khim. (Russ.) (Russ. Chem. Bull.)</i> , 1981, 487                                                                                                             |
| BARLOW   | 2,6-bis(Pyridinium-4-yl)benzene 2,5-di(4-pyridyl)benzene chloranilate hexahydrate                                         | Md.Akhtaruzzaman, M.Tomura, K.Takahashi, J.Nishida and Y.Yamashita, <i>Supramol.Chem.</i> , 2003, <b>15</b> , 239                                                           |
| BEBJIC   | 4,4'-(Azinodimethylene)dipyridinium chloranilate dichloromethane solvate                                                  | A.R.Kennedy and F.R.N.Watson, <i>Acta Crystallogr., Sect. C: Cryst. Struct. Commun.</i> , 2003, <b>59</b> , o613                                                            |
| CAHKUS   | bis(4-(2-Pyridyl)pyridinium) 2,5-dichloro-3,6-dioxy-1,4-benzoquinone                                                      | M.B.Zaman, M.Tomura and Y.Yamashita, <i>J.Org.Chem.</i> , 2001, <b>66</b> , 5987                                                                                            |
| CAHLIH   | Ethene-1,2-bis(4-pyridinium) 2,5-dichloro-3,6-dioxy-1,4-benzoquinone                                                      | M.B.Zaman, M.Tomura and Y.Yamashita, <i>J.Org.Chem.</i> , 2001, <b>66</b> , 5987                                                                                            |
| EWOWUI   | bis(Pyrrolidinium) chloranilate                                                                                           | H.Ishida, <i>Acta Crystallogr., Sect. E: Struct. Rep. Online</i> , 2004, <b>60</b> , o974                                                                                   |
| FAGZIW   | Barium 3,6-dichloro-2,5-dihydroxy-p-benzoquinone trihydrate                                                               | C.Robl and A.Weiss, <i>Z.Naturforsch., B: Chem.Sci.</i> , 1986, <b>41</b> , 1495                                                                                            |
| FIBCIC   | 4,4'-Bipyridinium 2,5-dichloro-1,4-benzoquinone-3,6-diolate                                                               | Md.B.Zaman, M.Tomura and Y.Yamashita, <i>Chem.Commun.</i> , 1999, 999                                                                                                       |
| FIBDEZ   | trans-1,2-bis(2-Pyridinium)ethylene 2,5-dichloro-1,4-benzoquinone-3,6-diolate                                             | Md.B.Zaman, M.Tomura and Y.Yamashita, <i>Chem.Commun.</i> , 1999, 999                                                                                                       |
| GOMBIT   | bis(1,2-Diazinium) 2,5-dichloro-6-hydroxy-p-benzoquinone-3-olate                                                          | H.Ishida and S.Kashino, <i>Acta Crystallogr., Sect. C: Cryst. Struct. Commun.</i> , 1999, <b>55</b> , 1149                                                                  |
| IYESUA   | bis(o-Toluidinium) 2,5-dichloro-1,4-benzoquinone-3,6-diolate                                                              | T.Fukunaga, N.Kumagai and H.Ishida, <i>Z.Naturforsch., A: Phys.Sci.</i> , 2003, <b>58</b> , 631                                                                             |
| IYETAH   | bis(m-Toluidinium) 2,5-dichloro-1,4-benzoquinone-3,6-diolate                                                              | T.Fukunaga, N.Kumagai and H.Ishida, <i>Z.Naturforsch., A: Phys.Sci.</i> , 2003, <b>58</b> , 631                                                                             |
| IZIHAA   | 4,7-bis(4-Pyridinium)-2,1,3-benzothiadiazole chloranilate trihydrate                                                      | Md.Akhtaruzzaman, M.Tomura, J.Nishida and Y.Yamashita, <i>J.Org.Chem.</i> , 2004, <b>69</b> , 2953                                                                          |
| JAVWUZ   | bis(Hydrazinium) chloranilate                                                                                             | O.Kuhl and S.Goutal, <i>Cryst. Growth Des.</i> , 2005, <b>5</b> , 1875                                                                                                      |
| JAXMEB   | bis(4-Methylimidazolium) chloranilate                                                                                     | Zi-Liang Wang and Lin-Heng Wei, <i>Acta Crystallogr., Sect. E: Struct. Rep. Online</i> , 2005, <b>61</b> , o3129                                                            |
| JIXCAU   | bis(1,8-bis(Dimethylamino)naphthalene) chloranilic acid dihydrate                                                         | J.A.Kanters, A.Schouten, A.J.M.Duisenberg, T.Glowiak, Z.Malarski, L.Sobczyk and E.Grech, <i>Acta Crystallogr., Sect. C: Cryst. Struct. Commun.</i> , 1991, <b>47</b> , 2148 |
| JIXCAU01 | bis(1,8-bis(Dimethylamino)naphthalene) chloranilic acid dihydrate                                                         | J.A.Kanters, A.Schouten, A.J.M.Duisenberg, T.Glowiak, Z.Malarski, L.Sobczyk and E.Grech, <i>Acta Crystallogr., Sect. C: Cryst. Struct. Commun.</i> , 1991, <b>47</b> , 2148 |
| OCANIQ   | bis(3-Picolinium) chloranilate dihydrate                                                                                  | H.Ishida, <i>Acta Crystallogr., Sect. E: Struct. Rep. Online</i> , 2004, <b>60</b> , o1900                                                                                  |
| ODAVUL   | bis(Piperidinium) chloranilate                                                                                            | M.S.Refat, H.A.-D.Ahmed, L.A.El-Zayat, T.Fukunaga and H.Ishida, <i>Acta Crystallogr., Sect. E: Struct. Rep. Online</i> , 2006, <b>62</b> , o1886                            |
| PEMJIB   | bis(1H-1,2,3-benzotriazol-3-ium) chloranilate                                                                             | Xiang-Gao Meng and Jin-Liang Qian, <i>Acta Crystallogr., Sect. E: Struct. Rep. Online</i> , 2006, <b>62</b> , o4178                                                         |
| QIBLES   | 1,4-bis((4-pyridinium)ethynyl)benzene chloranilate                                                                        | Md.Akhtaruzzaman, M.Tomura and Y.Yamashita, <i>Acta Crystallogr., Sect. E: Struct. Rep. Online</i> , 2001, <b>57</b> , o353                                                 |
| QIKGAS   | bis(Pyrazolium) chloranilate                                                                                              | H.Ishida and S.Kashino, <i>Acta Crystallogr., Sect. C: Cryst. Struct. Commun.</i> , 2001, <b>57</b> , 476                                                                   |
| QIKGEW   | bis(Imidazolium) chloranilate                                                                                             | H.Ishida and S.Kashino, <i>Acta Crystallogr., Sect. C: Cryst. Struct. Commun.</i> , 2001, <b>57</b> , 476                                                                   |
| QQQFJD01 | Sodium 3,6-dichloro-2,5-dihydroxy-p-benzoquinone trihydrate                                                               | R.Benchekroun and J.-M.Savariault, <i>Acta Crystallogr., Sect. C: Cryst. Struct. Commun.</i> , 1995, <b>51</b> , 186                                                        |
| SITBAZ   | bis(2-Methyl-1H-imidazol-3-ium) chloranilate                                                                              | Li-Hui Jia, Zong-E Mu and Zu-Li Liu, <i>Acta Crystallogr., Sect. E: Struct. Rep. Online</i> , 2008, <b>64</b> , o32                                                         |
| TAWVAP   | bis(S-Benzylthiuronium) chloranilate                                                                                      | D.V.Stergiou, S.Skoulika, N.P.Evmiridis and P.G.Veltsistas, <i>Chem.Mater.</i> , 2005, <b>17</b> , 1307                                                                     |
| TINYIZ   | Bis(adeninium) chloranilate dihydrate                                                                                     | K.Gotoh, R.Ishikawa and H.Ishida, <i>Acta Crystallogr., Sect. E: Struct. Rep. Online</i> , 2007, <b>63</b> , o4433                                                          |
| ULEJAW   | Tetrathiafulvalenium hemikis(2,5-dichloro-1,4-benzoquinone-3,6-diolate) hemikis(1,4-dichloro-2,3,5,6-tetrahydroxybenzene) | M.K.Kabir, H.Tobita, H.Matsuo, K.Nagayoshi, K.Yamada, K.Adachi, Y.Sugiyama, S.Kitagawa and S.Kawata, <i>Cryst. Growth Des.</i> , 2003, <b>3</b> , 791                       |
| WAKHAS   | bis(3-Methylpyrazolium) chloranilate                                                                                      | H.Ishida, <i>Acta Crystallogr., Sect. E: Struct. Rep. Online</i> , 2004, <b>60</b> , o2506                                                                                  |
| AMCLAN11 | Diammonium chloranilate monohydrate                                                                                       | K.Molcanov, B.Kojic-Prodic and A.Meden, <i>Croat.Chem.Acta</i> , 2009, <b>82</b> , 387                                                                                      |
| HUMNUZ   | Sesqui-caesium hemi-sodium chloranilate monohydrate                                                                       | K.Molcanov, B.Kojic-Prodic and A.Meden, <i>Croat.Chem.Acta</i> , 2009, <b>82</b> , 387                                                                                      |

|          |                                       |                                                                                        |
|----------|---------------------------------------|----------------------------------------------------------------------------------------|
| HUMPAH   | Di-caesium chloranilate               | K.Molcanov, B.Kojic-Prodic and A.Meden, <i>Croat.Chem.Acta</i> , 2009, <b>82</b> , 387 |
| QQQFIP01 | Di-potassium chloranilate monohydrate | K.Molcanov, B.Kojic-Prodic and A.Meden, <i>Croat.Chem.Acta</i> , 2009, <b>82</b> , 387 |
| QQQFIS01 | Di-rubidium chloranilate monohydrate  | K.Molcanov, B.Kojic-Prodic and A.Meden, <i>Croat.Chem.Acta</i> , 2009, <b>82</b> , 387 |
